# Supplementary material for: The classification of motor imagery response: an accuracy enhancement through the ensemble of random subspace k-NN
Source: PeerJ journal article supplement (doi:10.7717/peerj-cs.374), 2021-03-02
Supplement: Final_MATLAB_Script_for_Revised_Manuscript.zip [file Accuracy_plot.xlsx]

## Sheet: Sheet1
Data-1		Data-2 Sub-1		Data-2 Sub 2		Data-2 Sub 3		Data-3 Sub aa		Data-3 Sub al		Data-3 Sub-av		Data-3 Sub-aw		Data-3 Sub ay		Data-4 Sub A01		Data-4 Sub A02		Data-4 Sub A03		Data-4 Sub-A04		Data-4 Sub-A05		Data-4 Sub A06		Data-4 Sub A07		Data-4 Sub A08		Data-4 Sub A09
Selected	Not-selected	Selected	Not-selected	Selected	Not-selected	Selected	Not-selected	Selected	Not-selected	Selected	Not-selected	Selected	Not-selected	Selected	Not-selected	Selected	Not-selected	Selected	Not-selected	Selected	Not-selected	Selected	Not-selected	Selected	Not-selected	Selected	Not-selected	Selected	Not-selected	Selected	Not-selected	Selected	Not-selected	Selected	Not-selected
0.637566	0.687831	0.455556	0.566667	0.55	0.254167	0.541667	0.6875	76.43	0.521429	0.760714	0.492857	0.753571	0.428571	0.725	0.639286	0.853571	0.628571	0.5625	0.548611	0.673611	0.677083	0.489583	0.506944	0.416667	0.524306	0.354167	0.350694	0.388889	0.399306	0.326389	0.270833	0.493056	0.475694	0.458333	0.364583
0.634921	0.679894	0.475	0.463889	0.508333	0.35	0.45	0.529167	66.43	0.517857	0.646429	0.525	0.714286	0.489286	0.660714	0.564286	0.778571	0.521429	0.434028	0.520833	0.552083	0.486111	0.375	0.513889	0.493056	0.430556	0.263889	0.361111	0.444444	0.354167	0.34375	0.28125	0.506944	0.513889	0.385417	0.392361
0.791005	0.743386	0.738889	0.661111	0.725	0.545833	0.791667	0.795833	80.36	0.560714	0.867857	0.546429	0.867857	0.496429	0.832143	0.607143	0.907143	0.639286	0.635417	0.888889	0.805556	0.670139	0.572917	0.795139	0.642361	0.635417	0.524306	0.461806	0.576389	0.576389	0.46875	0.350694	0.822917	0.746528	0.635417	0.572917
0.833333	0.772487	0.847222	0.752778	0.791667	0.675	0.829167	0.866667	81.79	0.567857	0.875	0.510714	0.896429	0.585714	0.875	0.639286	0.860714	0.564286	0.722222	0.9375	0.927083	0.753472	0.75	0.850694	0.736111	0.767361	0.569444	0.447917	0.677083	0.659722	0.5	0.333333	0.861111	0.760417	0.774306	0.645833
0.902116	0.801587	0.888889	0.763889	0.8125	0.633333	0.870833	0.904167	85.36	0.528571	0.882143	0.510714	0.917857	0.639286	0.910714	0.603571	0.885714	0.539286	0.71875	0.930556	0.888889	0.788194	0.8125	0.805556	0.743056	0.770833	0.559028	0.534722	0.71875	0.684028	0.496528	0.34375	0.857639	0.798611	0.791667	0.677083
0.917989	0.798942	0.905556	0.911111	0.766667	0.666667	0.9125	0.8875	85	0.578571	0.896429	0.517857	0.917857	0.689286	0.889286	0.65	0.939286	0.578571	0.746528	0.923611	0.888889	0.833333	0.798611	0.833333	0.777778	0.791667	0.618056	0.555556	0.673611	0.680556	0.538194	0.361111	0.857639	0.892361	0.795139	0.680556
0.949735	0.798942	0.916667	0.927778	0.779167	0.675	0.883333	0.929167	87.14	0.564286	0.892857	0.517857	0.907143	0.592857	0.907143	0.685714	0.928571	0.592857	0.763889	0.9375	0.888889	0.795139	0.788194	0.854167	0.763889	0.795139	0.59375	0.538194	0.6875	0.763889	0.569444	0.333333	0.864583	0.899306	0.805556	0.673611
0.920635	0.761905	0.925	0.919444	0.7625	0.691667	0.883333	0.941667	90.71	0.510714	0.889286	0.528571	0.889286	0.617857	0.903571	0.664286	0.917857	0.557143	0.798611	0.9375	0.90625	0.802083	0.763889	0.857639	0.770833	0.802083	0.5625	0.503472	0.701389	0.809028	0.555556	0.357639	0.875	0.895833	0.805556	0.6875
0.931217	0.812169	0.919444	0.927778	0.758333	0.695833	0.9125	0.9375	92.14	0.485714	0.857143	0.592857	0.910714	0.628571	0.907143	0.621429	0.914286	0.557143	0.8125	0.934028	0.90625	0.791667	0.788194	0.881944	0.819444	0.815972	0.635417	0.506944	0.725694	0.8125	0.527778	0.399306	0.864583	0.885417	0.770833	0.690972
0.931217	0.78836	0.936111	0.933333	0.783333	0.658333	0.925	0.920833	91.07	0.475	0.864286	0.635714	0.860714	0.614286	0.910714	0.582143	0.914286	0.542857	0.798611	0.927083	0.895833	0.819444	0.791667	0.868056	0.784722	0.815972	0.631944	0.538194	0.78125	0.791667	0.565972	0.423611	0.850694	0.878472	0.798611	0.680556
0.949735	0.843915	0.944444	0.922222	0.816667	0.683333	0.929167	0.9375	90.71	0.528571	0.842857	0.6	0.867857	0.696429	0.910714	0.592857	0.871429	0.567857	0.836806	0.934028	0.902778	0.847222	0.788194	0.892361	0.815972	0.826389	0.618056	0.527778	0.809028	0.805556	0.586806	0.46875	0.840278	0.875	0.802083	0.6875
0.949735	0.830688	0.972222	0.922222	0.7625	0.65	0.916667	0.929167	90.36	0.532143	0.85	0.603571	0.9	0.717857	0.878571	0.542857	0.853571	0.567857	0.857639	0.940972	0.899306	0.840278	0.802083	0.885417	0.822917	0.836806	0.631944	0.517361	0.819444	0.805556	0.569444	0.430556	0.840278	0.878472	0.809028	0.694444
0.939153	0.862434	0.975	0.941667	0.783333	0.708333	0.929167	0.925	89.64	0.553571	0.853571	0.603571	0.907143	0.703571	0.864286	0.557143	0.85	0.582143	0.923611	0.927083	0.885417	0.857639	0.802083	0.878472	0.8125	0.829861	0.701389	0.565972	0.819444	0.770833	0.611111	0.434028	0.847222	0.878472	0.784722	0.711806
0.949735	0.899471	0.972222	0.936111	0.816667	0.6625	0.916667	0.929167	95.71	0.560714	0.803571	0.607143	0.878571	0.703571	0.857143	0.603571	0.828571	0.582143	0.940972	0.930556	0.902778	0.850694	0.9375	0.895833	0.798611	0.78125	0.711806	0.552083	0.8125	0.802083	0.618056	0.413194	0.840278	0.875	0.784722	0.732639
0.952381	0.891534	0.972222	0.936111	0.783333	0.729167	0.929167	0.925	94.64	0.567857	0.832143	0.607143	0.9	0.703571	0.857143	0.607143	0.817857	0.571429	0.975694	0.944444	0.902778	0.854167	0.9375	0.909722	0.833333	0.809028	0.722222	0.590278	0.809028	0.8125	0.614583	0.447917	0.868056	0.888889	0.833333	0.756944
0.952381	0.867725	0.975	0.944444	0.8	0.683333	0.920833	0.933333	93.93	0.592857	0.796429	0.653571	0.878571	0.75	0.821429	0.560714	0.807143	0.567857	0.986111	0.958333	0.909722	0.854167	0.947917	0.916667	0.881944	0.836806	0.732639	0.545139	0.8125	0.826389	0.638889	0.472222	0.840278	0.885417	0.822917	0.756944
0.965608	0.854497	0.975	0.925	0.795833	0.6875	0.9375	0.929167	92.86	0.567857	0.810714	0.646429	0.860714	0.732143	0.857143	0.55	0.817857	0.575	0.972222	0.947917	0.90625	0.881944	0.951389	0.909722	0.875	0.847222	0.71875	0.59375	0.826389	0.809028	0.638889	0.524306	0.895833	0.909722	0.857639	0.798611
0.978836	0.928571	0.969444	0.927778	0.791667	0.708333	0.945833	0.920833	92.86	0.6	0.825	0.660714	0.889286	0.714286	0.842857	0.535714	0.807143	0.539286	0.982639	0.961806	0.916667	0.899306	0.9375	0.930556	0.868056	0.836806	0.753472	0.638889	0.850694	0.840278	0.635417	0.538194	0.888889	0.902778	0.864583	0.847222
0.978836	0.931217	0.975	0.933333	0.816667	0.708333	0.9125	0.916667	92.14	0.557143	0.810714	0.639286	0.892857	0.689286	0.85	0.567857	0.807143	0.528571	0.986111	0.965278	0.90625	0.913194	0.930556	0.923611	0.861111	0.815972	0.770833	0.631944	0.84375	0.836806	0.649306	0.545139	0.913194	0.90625	0.888889	0.836806
0.989418	0.92328	0.975	0.913889	0.85	0.691667	0.933333	0.945833	91.43	0.557143	0.857143	0.646429	0.896429	0.7	0.821429	0.567857	0.782143	0.528571	0.979167	0.965278	0.913194	0.909722	0.940972	0.923611	0.861111	0.857639	0.760417	0.645833	0.864583	0.840278	0.666667	0.586806	0.913194	0.895833	0.881944	0.822917
0.994709	0.878307	0.975	0.930556	0.8375	0.708333	0.929167	0.916667	92.14	0.578571	0.846429	0.614286	0.9	0.717857	0.846429	0.557143	0.778571	0.510714	0.975694	0.96875	0.923611	0.930556	0.944444	0.916667	0.895833	0.857639	0.760417	0.65625	0.885417	0.861111	0.645833	0.614583	0.913194	0.892361	0.885417	0.836806
0.994709	0.883598	0.977778	0.941667	0.841667	0.695833	0.933333	0.916667	91.07	0.607143	0.846429	0.596429	0.878571	0.7	0.825	0.542857	0.785714	0.478571	0.972222	0.979167	0.927083	0.9375	0.972222	0.923611	0.902778	0.854167	0.805556	0.65625	0.868056	0.84375	0.659722	0.611111	0.90625	0.885417	0.881944	0.885417
0.973545	0.875661	0.966667	0.952778	0.845833	0.7125	0.941667	0.933333	91.79	0.571429	0.842857	0.578571	0.896429	0.746429	0.803571	0.578571	0.767857	0.514286	0.982639	0.975694	0.9375	0.951389	0.972222	0.923611	0.899306	0.899306	0.739583	0.65625	0.878472	0.847222	0.684028	0.638889	0.920139	0.913194	0.902778	0.902778
0.973545	0.880952	0.986111	0.933333	0.825	0.708333	0.970833	0.925	87.5	0.546429	0.846429	0.614286	0.885714	0.753571	0.842857	0.578571	0.775	0.560714	0.982639	0.979167	0.954861	0.944444	0.972222	0.923611	0.902778	0.916667	0.798611	0.715278	0.885417	0.850694	0.666667	0.645833	0.930556	0.944444	0.885417	0.923611
0.973545	0.904762	0.977778	0.944444	0.870833	0.6875	0.954167	0.929167	86.43	0.578571	0.853571	0.528571	0.889286	0.742857	0.835714	0.532143	0.739286	0.560714	0.975694	0.986111	0.972222	0.972222	0.982639	0.972222	0.913194	0.923611	0.791667	0.784722	0.868056	0.878472	0.684028	0.677083	0.934028	0.954861	0.888889	0.899306
0.952381	0.888889	0.969444	0.933333	0.866667	0.720833	0.954167	0.929167	86.79	0.6	0.835714	0.564286	0.892857	0.739286	0.835714	0.6	0.735714	0.575
0.952381	0.891534	0.969444	0.947222	0.8375	0.695833	0.941667	0.929167	85.36	0.614286	0.835714	0.503571	0.885714	0.725	0.832143	0.596429	0.760714	0.567857
0.960317	0.873016	0.983333	0.947222	0.883333	0.733333	0.95	0.9375	84.64	0.635714	0.864286	0.553571	0.917857	0.725	0.825	0.603571	0.778571	0.528571
0.952381	0.904762	0.977778	0.961111	0.854167	0.75	0.95	0.925	86.79	0.614286	0.839286	0.607143	0.910714	0.767857	0.892857	0.571429	0.767857	0.525
0.952381	0.92328	0.933333	0.936111	0.833333	0.704167	0.95	0.933333	88.57	0.628571	0.846429	0.592857	0.907143	0.785714	0.907143	0.592857	0.771429	0.55
0.952381	0.936508	0.916667	0.941667	0.825	0.7125	0.9625	0.929167	85.36	0.617857	0.867857	0.557143	0.914286	0.785714	0.885714	0.557143	0.75	0.535714
0.949735	0.952381	0.933333	0.936111	0.85	0.704167	0.95	0.958333	85	0.617857	0.85	0.571429	0.914286	0.792857	0.914286	0.692857	0.771429	0.560714
0.939153	0.970899	0.930556	0.933333	0.866667	0.683333	0.95	0.920833	87.86	0.607143	0.846429	0.578571	0.9	0.828571	0.903571	0.653571	0.771429	0.514286
0.939153	0.970899	0.944444	0.938889	0.879167	0.679167	0.9625	0.925	83.93	0.596429	0.853571	0.639286	0.903571	0.832143	0.921429	0.65	0.767857	0.514286
0.949735	0.970899	0.938889	0.933333	0.841667	0.720833	0.9625	0.933333	85	0.585714	0.85	0.678571	0.903571	0.803571	0.907143	0.667857	0.775	0.55
0.928571	0.978836	0.938889	0.941667	0.791667	0.7125	0.975	0.933333	83.57	0.571429	0.875	0.678571	0.917857	0.842857	0.910714	0.646429	0.767857	0.546429
0.928571	0.981481	0.933333	0.938889	0.8125	0.704167	0.925	0.933333	85.71	0.560714	0.867857	0.667857	0.910714	0.860714	0.914286	0.667857	0.778571	0.571429
0.949735	0.978836	0.947222	0.930556	0.85	0.704167	0.933333	0.9125	84.64	0.546429	0.860714	0.707143	0.903571	0.864286	0.925	0.653571	0.807143	0.532143
0.931217	0.973545	0.941667	0.947222	0.8	0.645833	0.925	0.929167	86.43	0.575	0.860714	0.725	0.907143	0.867857	0.907143	0.667857	0.817857	0.596429
0.931217	0.973545	0.95	0.952778	0.8375	0.716667	0.920833	0.925	86.43	0.625	0.857143	0.707143	0.878571	0.857143	0.896429	0.667857	0.810714	0.6
0.931217	0.978836	0.941667	0.933333	0.825	0.7125	0.941667	0.954167	85.36	0.628571	0.857143	0.717857	0.889286	0.839286	0.885714	0.660714	0.825	0.642857
0.925608	0.981481	0.913889	0.944444	0.8125	0.745833	0.933333	0.920833	85	0.625	0.835714	0.75	0.889286	0.867857	0.860714	0.667857	0.810714	0.653571
0.928836	0.984127	0.919444	0.952778	0.833333	0.729167	0.945833	0.941667	86.07	0.675	0.85	0.742857	0.889286	0.914286	0.867857	0.667857	0.810714	0.671429
0.941481	0.981481	0.922222	0.947222	0.808333	0.729167	0.954167	0.941667	84.29	0.664286	0.846429	0.792857	0.885714	0.917857	0.846429	0.696429	0.828571	0.657143
0.941481	0.984127	0.919444	0.941667	0.833333	0.7	0.954167	0.933333	85.36	0.621429	0.839286	0.807143	0.885714	0.910714	0.860714	0.728571	0.810714	0.692857
0.914127	0.984127	0.916667	0.958333	0.775	0.708333	0.941667	0.929167	85.71	0.671429	0.85	0.803571	0.9	0.907143	0.825	0.764286	0.839286	0.717857
0.923545	0.986772	0.916667	0.952778	0.804167	0.7	0.929167	0.929167	85	0.7	0.842857	0.817857	0.882143	0.896429	0.835714	0.785714	0.835714	0.703571
0.934127	0.989418	0.922222	0.955556	0.795833	0.708333	0.925	0.941667	85	0.664286	0.860714	0.867857	0.910714	0.925	0.842857	0.807143	0.842857	0.678571
0.921481	0.989418	0.919444	0.930556	0.8125	0.716667	0.929167	0.941667	83.57	0.667857	0.842857	0.860714	0.892857	0.903571	0.842857	0.839286	0.839286	0.717857
0.921677	0.986772	0.925	0.941667	0.8	0.729167	0.9375	0.9375	84.29	0.685714	0.857143	0.864286	0.903571	0.903571	0.85	0.853571	0.835714	0.692857
0.916772	0.981481	0.941667	0.927778	0.8125	0.708333	0.933333	0.933333	86.07	0.721429	0.860714	0.875	0.9	0.9	0.842857	0.871429	0.839286	0.735714
0.906772	0.989418	0.938889	0.944444	0.7875	0.716667	0.941667	0.929167	85	0.692857	0.875	0.889286	0.882143	0.907143	0.853571	0.875	0.860714	0.75
0.914709	0.989418	0.927778	0.938889	0.783333	0.741667	0.941667	0.945833	85	0.710714	0.85	0.871429	0.907143	0.925	0.853571	0.892857	0.839286	0.753571
0.919418	0.992063	0.941667	0.958333	0.7875	0.7375	0.954167	0.941667	85.71	0.778571	0.864286	0.871429	0.9	0.925	0.85	0.878571	0.871429	0.735714
0.929418	0.989418	0.925	0.955556	0.8	0.7	0.920833	0.9375	83.21	0.757143	0.853571	0.867857	0.907143	0.942857	0.832143	0.903571	0.867857	0.771429
0.90127	0.989418	0.916667	0.975	0.779167	0.7625	0.916667	0.95	85.71	0.871429	0.85	0.882143	0.903571	0.95	0.825	0.896429	0.867857	0.778571
0.912063	0.992063	0.925	0.986111	0.7875	0.766667	0.9375	0.95	84.29	0.885714	0.853571	0.882143	0.885714	0.957143	0.842857	0.917857	0.871429	0.882143
0.939418	0.989418	0.925	0.988889	0.783333	0.783333	0.929167	0.958333	85	0.942857	0.85	0.871429	0.907143	0.957143	0.85	0.928571	0.875	0.925
0.912063	0.994709	0.927778	0.975	0.779167	0.766667	0.9375	0.954167	85	0.942857	0.857143	0.896429	0.896429	0.967857	0.839286	0.921429	0.885714	0.914286
0.929418	0.989418	0.933333	0.980556	0.779167	0.8625	0.9375	0.975	85.71	0.946429	0.846429	0.928571	0.9	0.953571	0.842857	0.917857	0.867857	0.932143
0.924709	0.997354							85.36	0.964286	0.85	0.914286	0.907143	0.960714	0.842857	0.928571	0.857143	0.925
0.904709	0.992063							85.36	0.967857	0.853571	0.925	0.9	0.971429	0.839286	0.935714	0.885714	0.957143
0.904709	0.994709							85.36	0.992857	0.857143	0.921429	0.917857	0.967857	0.860714	0.960714	0.878571	0.971429
0.904709	0.997354							84.64	0.982143	0.85	0.914286	0.907143	0.964286	0.853571	0.957143	0.917857	0.964286
								86.07	0.996429	0.846429	0.925	0.910714	0.960714	0.842857	0.953571	0.9	0.95
								85	0.985714	0.857143	0.925	0.882143	0.967857	0.878571	0.953571	0.892857	0.957143
								86.79	0.985714	0.860714	0.921429	0.910714	0.971429	0.85	0.95	0.896429	0.946429
								85	0.985714	0.860714	0.939286	0.921429	0.975	0.85	0.957143	0.917857	0.964286
								87.14	0.982143	0.857143	0.917857	0.910714	0.971429	0.860714	0.957143	0.9	0.953571
								86.07	0.982143	0.878571	0.932143	0.932143	0.967857	0.864286	0.953571	0.925	0.964286
								86.07	0.982143	0.857143	0.935714	0.925	0.960714	0.867857	0.953571	0.939286	0.960714
								86.07	0.978571	0.864286	0.935714	0.928571	0.967857	0.85	0.957143	0.935714	0.957143
								87.14	0.982143	0.871429	0.939286	0.925	0.95	0.882143	0.960714	0.942857	0.953571
								85.36	0.982143	0.864286	0.928571	0.939286	0.953571	0.892857	0.953571	0.925	0.95
								86.07	0.985714	0.867857	0.935714	0.939286	0.960714	0.882143	0.95	0.935714	0.957143
								88.21	0.992857	0.875	0.946429	0.942857	0.971429	0.889286	0.95	0.942857	0.946429
								86.07	0.992857	0.864286	0.935714	0.942857	0.960714	0.882143	0.957143	0.925	0.960714
								87.14	0.992857	0.867857	0.939286	0.939286	0.971429	0.889286	0.957143	0.935714	0.960714
								86.79	0.985714	0.85	0.935714	0.95	0.960714	0.914286	0.946429	0.95	0.95
								91.07	0.978571	0.878571	0.925	0.932143	0.964286	0.9	0.964286	0.953571	0.942857
								91.07	0.982143	0.871429	0.939286	0.95	0.964286	0.917857	0.960714	0.95	0.957143
								92.86	0.992857	0.896429	0.935714	0.939286	0.960714	0.914286	0.964286	0.935714	0.960714
								93.93	0.989286	0.9	0.971429	0.95	0.960714	0.903571	0.964286	0.939286	0.95
								94.29	0.989286	0.889286	0.975	0.95	0.967857	0.907143	0.967857	0.957143	0.964286
								96.43	0.982143	0.892857	0.971429	0.957143	0.967857	0.910714	0.967857	0.942857	0.953571
								95.71	0.989286	0.9	0.978571	0.953571	0.971429	0.928571	0.967857	0.935714	0.960714
								95.71	0.989286	0.889286	0.960714	0.957143	0.967857	0.932143	0.967857	0.935714	0.957143
								95.71	0.989286	0.889286	0.978571	0.946429	0.971429	0.939286	0.982143	0.932143	0.946429
								96.43	0.985714	0.907143	0.957143	0.957143	0.964286	0.928571	0.978571	0.946429	0.946429
								97.5	0.982143	0.896429	0.946429	0.953571	0.975	0.935714	0.967857	0.935714	0.978571
								96.43	0.985714	0.921429	0.960714	0.960714	0.964286	0.921429	0.964286	0.960714	0.95
								95.36	0.985714	0.935714	0.964286	0.942857	0.957143	0.932143	0.964286	0.942857	0.928571
								95.36	0.971429	0.925	0.953571	0.957143	0.960714	0.921429	0.960714	0.928571	0.960714
								97.14	0.975	0.921429	0.953571	0.957143	0.957143	0.928571	0.960714	0.935714	0.95
								97.14	0.975	0.921429	0.946429	0.964286	0.960714	0.935714	0.967857	0.932143	0.95
								96.43	0.978571	0.932143	0.946429	0.95	0.960714	0.932143	0.975	0.932143	0.946429
								97.14	0.971429	0.928571	0.942857	0.967857	0.967857	0.939286	0.971429	0.928571	0.935714
								94.64	0.978571	0.935714	0.946429	0.967857	0.967857	0.939286	0.953571	0.932143	0.942857
								95.36	0.975	0.928571	0.939286	0.960714	0.967857	0.942857	0.971429	0.95	0.932143
								96.79	0.971429	0.928571	0.939286	0.960714	0.967857	0.942857	0.964286	0.914286	0.942857
								95.36	0.953571	0.942857	0.946429	0.960714	0.953571	0.939286	0.964286	0.928571	0.928571
								95.36	0.946429	0.939286	0.953571	0.960714	0.971429	0.95	0.967857	0.917857	0.914286
								96.79	0.942857	0.932143	0.95	0.946429	0.964286	0.935714	0.946429	0.925	0.928571
								96.43	0.960714	0.935714	0.939286	0.960714	0.964286	0.942857	0.964286	0.935714	0.910714
								96.07	0.946429	0.939286	0.946429	0.960714	0.964286	0.942857	0.953571	0.928571	0.928571
								95.71	0.942857	0.939286	0.957143	0.960714	0.967857	0.953571	0.942857	0.942857	0.928571
								95.71	0.946429	0.932143	0.953571	0.971429	0.953571	0.95	0.932143	0.9	0.903571
								95.36	0.939286	0.932143	0.95	0.960714	0.953571	0.95	0.939286	0.925	0.907143
								92.14	0.928571	0.939286	0.939286	0.953571	0.957143	0.917857	0.932143	0.910714	0.910714
								91.43	0.946429	0.946429	0.953571	0.946429	0.964286	0.917857	0.946429	0.889286	0.892857
								92.86	0.946429	0.928571	0.928571	0.95	0.957143	0.910714	0.935714	0.903571	0.907143
								96.43	0.939286	0.932143	0.942857	0.95	0.957143	0.925	0.928571	0.903571	0.921429
								93.57	0.939286	0.939286	0.932143	0.953571	0.953571	0.925	0.925	0.903571	0.914286
								92.5	0.921429	0.946429	0.946429	0.946429	0.967857	0.917857	0.917857	0.892857	0.892857
								91.43	0.939286	0.932143	0.935714	0.939286	0.946429	0.925	0.925	0.925	0.903571
								93.21	0.939286	0.932143	0.935714	0.957143	0.95	0.935714	0.939286	0.878571	0.896429
								93.57	0.917857	0.95	0.928571	0.95	0.95	0.939286	0.921429	0.882143	0.871429
								92.5	0.917857	0.932143	0.928571	0.971429	0.946429	0.925	0.925	0.885714	0.889286
