# Supplementary material for: The classification of motor imagery response: an accuracy enhancement through the ensemble of random subspace k-NN
Source: PeerJ journal article supplement (doi:10.7717/peerj-cs.374), 2021-03-02
Supplement: Final_MATLAB_Script_for_Revised_Manuscript.zip [file Test Lavel_IIIA.xlsx]

## Sheet: Sheet1
k3b	k6b	l1b
3	2	2
4	1	1
3	2	2
3	1	1
3	3	3
3	1	1
3	2	2
4	4	4
2	3	3
4	3	3
2	4	4
4	1	1
2	2	2
2	2	2
1	4	4
4	3	3
1	2	2
4	3	3
4	1	1
1	4	4
2	4	4
1	1	1
2	4	4
4	3	3
1	3	3
2	2	2
4	1	1
1	4	4
1	1	1
2	4	4
3	2	2
1	4	4
2	3	3
2	3	3
3	2	2
1	2	2
3	4	4
1	1	1
3	1	1
4	3	3
1	1	1
1	4	4
1	4	4
2	1	1
4	1	1
3	2	2
2	1	1
4	4	4
1	3	3
3	2	2
2	2	2
4	1	1
1	1	1
2	3	3
3	4	4
4	3	3
1	3	3
3	4	4
2	1	1
1	3	3
2	2	2
1	3	3
4	4	4
2	3	3
3	3	3
2	4	4
4	3	3
4	1	1
4	4	4
2	2	2
3	3	3
2	4	4
3	4	4
1	2	2
4	2	2
1	2	2
4	1	1
3	2	2
3	2	2
3	1	1
1	4	4
1	2	2
1	4	4
2	4	4
1	4	4
2	4	4
3	3	3
3	3	3
1	3	3
4	1	1
2	1	1
4	2	2
1	4	4
2	1	1
2	3	3
3	4	4
3	1	1
2	2	2
1	2	2
3	1	1
4	4	4
2	2	2
3	3	3
4	3	3
4	4	4
2	3	3
3	3	3
2	1	1
1	4	4
1	3	3
2	1	1
3	1	1
4	2	2
1	2	2
3	3	3
4	2	2
4	1	1
3	1	1
4	2	2
4	2	2
3	2	2
4	2	2
2	4	4
3	2	2
3	4	4
1	1	1
3	3	3
3	1	1
4	4	4
3	4	4
2	2	2
3	4	4
3	4	4
1	3	3
1	4	4
4	3	3
2	3	3
4	1	1
2	2	2
4	1	1
2	3	3
4	1	1
3	1	1
2	1	1
1	2	2
4	2	2
1	2	2
4	4	4
2	1	1
1	2	2
3	1	1
2	3	3
4	2	2
2	1	1
1	3	3
1	4	4
1	3	3
4	3	3
1	3	3
2	4	4
2	4	4
1	1	1
2	2	2
1	2	2
3	3	3
1	3	3
2	1	1
4	3	3
3	3	3
3	1	1
4	1	1
1	2	2
2	2	2
2	3	3
4	2	2
3	2	2
2	4	4
3	4	4
1	3	3
4	2	2
4	4	4
1	4	4
4	2	2
3	4	4
3	4	4
2	2	2
1	1	1
4	1	1
1	3	3
4	3	3
2	4	4
4	3	3
3	4	4
3	2	2
2	1	1
2	1	1
4	3	3
1	4	4
1	1	1
3	1	1
1	1	1
4	2	2
4	3	3
1	2	2
1	3	3
2	2	2
1	3	3
4	1	1
3	4	4
2	1	1
2	3	3
1	4	4
1	2	2
3	4	4
4	1	1
3	4	4
3	3	3
4	2	2
1	4	4
3	3	3
2	4	4
3	1	1
4	2	2
3	4	4
3	3	3
4	2	2
3	4	4
1	3	3
4	2	2
2	4	4
3	1	1
4	2	2
4	1	1
2	1	1
2	4	4
2	1	1
1	3	3
2	1	1
2	3	3
1	2	2
4
2
4
4
4
4
3
3
3
1
1
2
4
1
3
4
1
2
2
1
4
2
3
3
4
3
3
1
4
3
1
1
2
2
3
2
1
1
2
2
2
2
4
2
4
1
3
1
4
4
2
4
4
3
4
3
3
1
2
1
3
1
1
1
2
2
2
4
1
2
1
3
2
1
3
4
3
3
3
4
4
1
2
2
3
3
1
3
3
1
1
2
2
3
2
2
4
4
3
2
4
4
2
4
4
2
1
1
3
3
4
3
4
2
1
1
3
4
1
1
